**Title:** Pretreatment and interventional parameters predict excellent recanalization of large vessel occlusion in patients with acute ischemic stroke

**Authors:** Vivek Yedavalli, MD, MS<sup>1</sup>, Manisha Koneru, MS<sup>2</sup>, Meisam Hoseinyazdi, MD<sup>1</sup>, Cynthia Greene, MD, PhD<sup>1</sup>, Karen Copeland, PhD<sup>3</sup>, Risheng Xu, MD, PhD<sup>4</sup>, Licia Luna, MD, PhD<sup>1</sup>, Justin Caplan, MD<sup>4</sup>, Adam Dmytriw MD, MPH, MSc<sup>5</sup>, Adrien Guenego, MD, PhD<sup>6</sup>, Jeremy Heit, MD, PhD<sup>7</sup>, Gregory Albers, MD<sup>8</sup>, Max Wintermark, MD, MS, MBA<sup>9</sup>, Fernando Gonzalez, MD<sup>4</sup>, Victor Urrutia, MD<sup>10</sup>, Judy Huang, MD<sup>4</sup>, Richard Leigh, MD<sup>10</sup>, Elisabeth Marsh, MD<sup>10</sup>, Rafael Llinas, MD<sup>10</sup>, Argye Hillis, MD<sup>10</sup>, Kambiz Nael, MD<sup>11</sup>

**Affiliations:**

<sup>1</sup>Department of Radiology and Radiological Sciences, Johns Hopkins School of Medicine

<sup>2</sup>Cooper Medical School of Rowan University

<sup>3</sup>Boulder Statistics

<sup>4</sup>Department of Neurosurgery, Johns Hopkins School of Medicine

<sup>5</sup>Department of Neuroradiology, Massachusetts General Hospital & Harvard Medical School

<sup>6</sup>Department of Radiology, Université Libre De Bruxelles Hospital Erasme

<sup>7</sup>Department of Radiology, Stanford University School of Medicine

<sup>8</sup>Department of Neurology, Stanford University School of Medicine

<sup>9</sup>Department of Radiology, University of Texas MD Anderson Center

<sup>10</sup>Department of Neurology, Johns Hopkins School of Medicine

<sup>11</sup>Department of Radiology, David Geffen School of Medicine at UCLA

**Short Title:** Predicting mTICI 2c/3 vs 2b in AIS-LVO

**Keywords:** ischemic stroke; large vessel occlusion; cerebral blood volume; reperfusion

**Corresponding Author:**

Vivek Yedavalli, MD, MS

Department of Radiology and Radiological Sciences, Johns Hopkins School of Medicine  
Phipps B122-D

Baltimore, MD 21287

[vyedava1@jhmi.edu](mailto:vyedava1@jhmi.edu)

**Total Manuscript Word Count:** 5538

## **Abstract:**

**Background:** In patients with acute ischemic stroke secondary to large vessel occlusion (AIS-LVO), improved functional outcomes have been reported in patients who achieve Modified Thrombolysis In Cerebral Infarction (mTICI) 2c/3 (excellent recanalization) over mTICI 2b. We aimed to determine pretreatment and interventional variables that could predict achieving mTICI 2c/3 over 2b reperfusion in patients who underwent technically successful mechanical thrombectomy (MT).

**Methods:** In this retrospective study, consecutive AIS patients with anterior circulation LVO who underwent MT and achieved recanalization with mTICI 2b/2c/3 were included. We evaluated the association between pretreatment clinical and imaging variables and interventional parameters in patients who achieved mTICI 2c/3 vs. 2b using logistic regression and ROC analyses.

**Results:** From 5/11/2019 to 10/09/2022, 149 consecutive patients met our inclusion criteria (median 70 years old [IQR 65 - 78.5], 57.7% female). Adjusted multivariate regression analyses showed that patients with excellent recanalization had lower admission NIHSS (aOR 0.93,  $p = 0.036$ ), were less likely to have a history of diabetes mellitus (DM) (aOR 0.42,  $p = 0.050$ ) and prior stroke (aOR 0.27,  $p = 0.007$ ), had a cerebral blood volume (CBV) index  $\geq 0.7$  (aOR 3.75,  $p = 0.007$ ), and were more likely to achieve excellent recanalization with aspiration alone (aOR 2.89,  $p = 0.012$ ). A multivariate logistic regression model comprising these independent factors predicted mTICI 2c/3 with an AUC 0.79 (95% CI: 0.68-0.86;  $p < 0.001$ ), sensitivity of 94%; specificity of 41%.

Conclusion: Robust collateral status (CS) defined by CBV index  $\geq 0.7$ , absence of DM and prior stroke, lower initial stroke severity, and direct aspiration are all predictive of excellent recanalization in successfully recanalized AIS-LVO patients. Our findings highlight the prognostic implications of robust CS, DM and stroke prevention, as well as use of aspiration alone in maximizing the likelihood of excellent recanalization.

## **Non-standard Abbreviations and Acronyms**

| <b>Abbreviation</b>           | <b>Definition</b>                                      |
|-------------------------------|--------------------------------------------------------|
| AIS                           | Acute ischemic stroke                                  |
| LVO                           | Large vessel occlusion                                 |
| mTICI                         | Modified thrombolysis in cerebral infarction score     |
| MT                            | Mechanical thrombectomy                                |
| CS                            | Collateral status                                      |
| ICA                           | Internal carotid artery                                |
| M1                            | M1 segment of middle cerebral artery                   |
| M2                            | M2 segment of middle cerebral artery                   |
| CTP                           | CT perfusion                                           |
| NIHSS                         | National Institutes of Health Stroke Scale             |
| mRS                           | Modified Rankin score                                  |
| DM                            | Diabetes mellitus                                      |
| ASPECTS                       | Alberta stroke program early computed tomography score |
| Tmax                          | Time to maximum                                        |
| rCBF                          | Relative cerebral blood flow                           |
| Hypoperfusion intensity ratio | HIR                                                    |
| CBV                           | Cerebral blood volume                                  |
| ROC                           | Receiver operator curve                                |
| AUC                           | Area under the curve                                   |

## **Introduction:**

In patients presenting with acute ischemic stroke (AIS) due to anterior circulation large vessel occlusion (LVO), mechanical thrombectomy (MT) is now the standard of care for up to 24 hours after symptom onset.<sup>1</sup> Successful recanalization, defined as modified thrombolysis in cerebral infarction (mTICI) scores of 2b or higher, is also associated with improved outcomes irrespective of the number of passes.<sup>2</sup> Furthermore, the degree of recanalization even amongst the successfully recanalized patients plays a role in achieving functional independence. Prior studies have demonstrated that patients who achieve mTICI 2c and 3, also referred to as excellent recanalization, have early neurological improvement<sup>3,4</sup> and better clinical outcomes than those who achieve mTICI 2b.<sup>3,5-11</sup>

However, few studies have directly investigated which pretreatment and interventional parameters are predictive of mTICI 2c/3 versus 2b in the successfully recanalized AIS-LVO group. Moreover, pretreatment imaging parameters are yet to be assessed for potentially predicting mTICI 2c/3 recanalization. Therefore, the aim of our study is to determine which pretreatment imaging, clinical, and interventional parameters may be predictive of mTICI 2c/3 recanalization. We hypothesize that more robust collateral status (CS) is associated with increased likelihood of achieving excellent recanalization.

## **Materials and Methods:**

This study was approved by an institutional review board with waiver of informed consent. The corresponding author has full access to all data in the study and assumes

responsibility for integrity and analyses. Data will be made available upon reasonable request to the corresponding author. This study was reported in accordance with Strengthening the Reporting of Observational Studies in Epidemiology (STROBE) guidelines.

### Study Population:

We performed a retrospective cohort study of all patients presenting with AIS caused by a large vessel occlusion from 4/3/2019 to 5/25/2022 comprised of data from two comprehensive stroke centers. This study was approved by our institutional review board and complies with the Health Insurance Portability and Accountability Act. Inclusion criteria were a) patients with AIS secondary to anterior circulation LVO (defined as distal intracranial ICA, M1, and proximal M2 segments of the middle cerebral artery [MCA]) who were evaluated within 24 hours of symptom onset, b) underwent CTP with postprocessed maps available on the Rapid software platform (iSchemaview, Menlo Park, CA), and c) successfully treated with MT to achieve mTICI 2b, 2c, or 3 recanalization. MT was performed by one of four experienced neurointerventionalists using FDA-approved thrombectomy devices at their discretion and in accordance with current technical standards.<sup>12</sup> The mTICI was also determined by the performing neuro-interventionalist. Study participants were then categorized into either a mTICI 2b or a combined mTICI 2c/3 cohort for comparative analysis.

### Data Collection:

Baseline and clinical data collected for each patient included demographics, risk factors for AIS including heart disease, hypertension, hyperlipidemia, diabetes mellitus (DM), atrial fibrillation, prior stroke, smoking status, alcohol status, history of malignancy, and body mass index (BMI), admission NIH stroke scale (admission NIHSS), anticoagulation status, site of occlusion, and laterality of occlusion. Heart disease was defined as inclusive of coronary artery disease (CAD), cardiomyopathy, congestive heart failure, and valvular disease.

Baseline lab parameters and vital signs were also collected including hemoglobin (Hb), glucose, creatinine clearance, blood urea nitrogen-to-creatinine ratio, systolic blood pressure (SBP), and diastolic blood pressure (DBP).

Additional collected parameters include IV thrombolytic administration, when applicable; door to needle time; door to groin puncture time; time from groin puncture to recanalization, door to recanalization time, number of passes, MT method (i.e., aspiration alone, stent retriever alone, or combined), and mTICI score.

The ASPECTS score, clot burden score (CBS), single phase CTA score based on Tan criteria<sup>13</sup>, multiphase CTA score on source CTP images (mCTA) based on the Menon mCTA collateral score<sup>14</sup>, and digital subtraction angiography (DSA) collateral score based on ASITN/SIR criteria<sup>15</sup> were assessed by a board certified neuroradiologist (V.S.Y., 6 years of experience).

#### Imaging Analysis:

Whole brain CTP was performed with the following parameters: 70 kVP, 200 Effective mAs, Rotation Time 0.25 s, Average Acquisition Time 60 s, Collimation 48 x

1.2 mm, Pitch Value 0.7, 4D Range 114 mm x 1.5 seconds. CTP images are then post-processed using RAPID commercial software (IschemaView, Menlo Park, CA) for generating quantitative (relative cerebral blood flow (rCBF) < 20%, 30%, 34%, and 38%) and time to maximum (Tmax) volumes > 4 seconds, 6 seconds, 8 seconds, and 10 seconds. The hypoperfusion intensity ratio (HIR), defined as the ratio of the Tmax > 10 seconds and Tmax > 6 seconds volumes, was collected in addition to the cerebral blood volume index (CBV Index), which is defined as the relative CBV within the Tmax > 6 seconds volume.

Both centers within this study used the same CTP parameters.

#### Study Outcomes:

The primary outcome measure was achieving mTICI 2c/3 recanalization (excellent recanalization).

#### Statistical Analysis:

Patients were grouped by recanalization score (i.e., mTICI 2c/3 and mTICI 2b). Continuous variables were reported as medians with interquartile range (IQR); categorical variables were reported as frequencies. Two-sided Student's t-test, nonparametric Wilcoxon rank sum tests, chi-square test, or Fisher's exact test were performed as applicable for between-group comparisons. Univariate regressions for outcome of mTICI 2c/3 vs. 2b were performed to yield unadjusted odds ratios (OR). Optimal cutoff point for CBV index was determined using receiver operating characteristics (ROC) curve and maximizing Youden's J statistical index. Only



significant univariate predictors were inputted into a multivariate forward stepwise logistic regression with greatest minimization of corrected Akaike information criterion (AICc) to derive adjusted odds ratios (aOR) for predictors that remained in the final model. Multivariate model parameters reported include AICc, Bayesian information criterion (BIC), and whole model chi-square test. Receiver operating characteristics (ROC) curve was bootstrapped with 2500 samples to yield area under the curve (AUC), sensitivity, and specificity with 95% confidence intervals (CI). Significance was pre-specified at 0.05.

## **Results:**

A total of 419 consecutive patients with a vessel occlusion were identified in our database from 4/3/2019 to 5/25/2022. One hundred seventy-two were excluded because LVO was not present, MT was not attempted, or MT was unsuccessful. Ninety-eight were excluded because CTP information was not available at the time of imaging or imaging was nondiagnostic. A total of 149 patients (median, IQR 70 years old [64 - 78.5], 57.7% female) were included in this study.

### **Univariate regression analyses:**

#### *Baseline characteristics:*

The location of LVO was internal cerebral artery (n=6, 4.0%); MCA-M1 (n=112, 75.2%); and MCA-proximal M2 (n=31, 20.8%). Patients in the excellent recanalization group had a lower prevalence of DM (22.7% versus 41.0%,  $p = 0.028$ ) and prior stroke (16.4% versus 38.5%,  $p = 0.004$ ), and they and presented with lower average

admission NIHSS (median, 15 [IQR 1 -19] versus 18 [IQR 13-23],  $p = 0.031$ ). See Table 1.

*Imaging parameters:*

The relative cerebral blood flow (rCBF) volumes were lower in patients in the excellent recanalization group. The breakdown of rCBF volumes (median, IQR, ml) in patients with excellent recanalization vs. 2B were as follow: rCBF < 20% (0 ml, [0-5.3] versus 4 ml [0-31];  $p = 0.001$ ); rCBF < 30% (0 ml [0-17.3] versus 17 ml [0-67],  $p = 0.002$ ); rCBF < 34% (7 ml [0-26] versus 22 ml [0-76],  $p = 0.005$ ); rCBF < 38% (11 ml [0-34.3] versus 29 ml [5-87],  $p = 0.005$ ). CBV index with a threshold of  $\geq 0.7$  was higher in the mTICI 2c/3 group (97/110, 88.2% versus 25/39, 64%,  $p < 0.001$ ). See Table 2.

*Interventional parameters:*

Patients with excellent recanalization had fewer passes (median 1, [IQR 1-1] versus 1 [IQR 1-2],  $p = 0.015$ ), higher rate of direct aspiration MT (65.4% versus 35.9%,  $p = 0.005$ ), lower rates of combined aspiration and stent retriever (29.1% versus 56.4%,  $p = 0.005$ ) and shorter groin puncture to recanalization time (minutes) (median 32 minutes, [IQR 22-47] versus 48 [IQR 26-78],  $p = 0.002$ ). See Table 3.

Adjusted multivariate logistic regression analyses:

After performing multivariate logistic regression analysis, the following parameters were identified as independent variables for prediction of excellent recanalization: lower admission NIHSS (aOR 0.93,  $p = 0.036$ ), absence of history of DM

(aOR 0.42,  $p = 0.050$ ), and absence of prior stroke (aOR 0.27,  $p = 0.007$ ), CBV index  $\geq 0.7$  (aOR 3.75,  $p = 0.007$ ). Among interventional factors, aspiration-MT alone remained the only independent variables in predicting excellent recanalization (aOR 2.89,  $p = 0.012$ ). See Table 4.

### ROC Analysis:

ROC analyses showed that each of the variables ultimately included within the multivariate model had modest diagnostic performance in univariate logistic regression models for predicting excellent recanalization. These include (AUC, [95% CI]): 0.62 [0.54 - 0.71] for rCBV index; 0.59 [0.51 - 0.68] for DM; 0.61 [0.53 - 0.70] for prior stroke; 0.62 [0.51 - 0.72] for admission NIHSS; 0.65 [0.55 - 0.73] for aspiration-MT.

The multivariate logistic regression model composed of CBV Index  $\geq 0.7$ , absence of DM, absence of prior stroke, admission NIHSS, and aspiration-MT demonstrated strong diagnostic performance with an AUC of 0.79 (95% CI: 0.68 - 0.86),  $p < 0.001$ ) with a sensitivity of 0.94 (95% CI: 0.87-0.98) and specificity of 0.41 (95% CI: 0.01-0.60). See Figure 1.

### Discussion:

Our study demonstrates that robust CS (as assessed by CBV index), aspiration alone, absence of DM and prior stroke, and lower initial stroke severity are all independent predictors of excellent recanalization amongst successfully recanalized AIS-LVO patients, with a strong combined predictive performance (AUC 0.79,  $p < 0.001$ ). Our findings underscore the importance of pretreatment CS and treating these

patients for their modifiable risk factors in order to maximize the likelihood of excellent recanalization, a strong indicator of favorable functional outcomes.<sup>3-5</sup>

A notable finding from our study is the utility of the CBV index not only as a reliable marker of CS but also as an independent predictor of excellent recanalization. The CBV index with a threshold of  $>0.7$  has been previously validated as a predictor of CS<sup>16,17</sup>, infarct growth rate, and clinical outcomes in AIS-LVO patients.<sup>17-19</sup>

In our study, we also identified that CBV index at an optimal threshold of  $\geq 0.7$  also predicts excellent recanalization, as a significantly higher percentage of CBV index  $\geq 0.7$  achieved excellent recanalization had CBV index  $\geq 0.7$  (88.2% versus 64% who achieved mTICI 2b,  $p < 0.001$ ). Moreover, a higher CBV index was strongly associated with achieving excellent recanalization (aOR 3.75,  $p = 0.007$ ). The higher CBV index is a representation of collaterals as it is thought to indirectly represent blood volume that is preserved within the penumbra by compensatory responses such as autoregulation.

Our results also support prior work demonstrating the importance of CBV in maintaining robust CS and its subsequent effect of reperfusion. In the Interventional Management of Stroke III (IMS-III) trial, Liebeskind et al<sup>20</sup> previously concluded that robust CS is associated with better recanalization and overall outcomes. In a subanalysis of the same trial, Vagal et al<sup>21</sup> demonstrated an association with good CS and larger mismatch ratios on CT angiography/CTP evaluation, supporting the role of an autoregulatory response in maintaining tissue viability. Cortijo et al also reported that patients with a higher relative CBV have more robust CS and earlier recanalization.<sup>22</sup> Most recently, Nael et al<sup>23</sup> also highlighted the crucial role of CBV plays as a measure of collaterals. In this study, by incorporating CBV as an element of a multiparametric

measure, described as the perfusion collateral index, they showed that higher baseline CS results in improved functional outcome and better reperfusion status following MT.<sup>23</sup> It is thought that the pathophysiological mechanism behind increased CBV, as a component of robust CS, is due to prevention of stasis leading to additional distal occlusions from embolization.<sup>24</sup> Furthermore, robust CS can also improve clearance of proximal thrombi<sup>25</sup> and create pressure gradients across the occlusion that make thrombus retrieval more achievable.<sup>24</sup>

Besides CBV index, our results also revealed important findings about the interventional parameters as we showed that patients who achieved excellent recanalization had significantly fewer number of passes, were more likely to achieve recanalization through aspiration alone, and also had shorter times from groin puncture to recanalization ( $p = 0.002$ ). These findings are undoubtedly intertwined as first pass effect<sup>26</sup> leads to shorter time to recanalization<sup>27,28</sup>, with both factors being associated with better outcomes. Direct aspiration is also increasingly linked to achieving excellent recanalization<sup>11,29-32</sup> compared to other techniques, and is likely also a contributing factor to the shorter puncture to recanalization times. However, in logistic regression analysis, aspiration-MT alone outperformed the other interventional measures and remained as the only contributing factor to our final model.

Our baseline clinical characteristics also revealed some notable findings. Unsurprisingly, patients with previous stroke, history of DM, and higher initial stroke severity were less likely to achieve excellent recanalization. Prior stroke is known to increase stroke recurrence<sup>33</sup>, and likely affects the robustness of CS. DM and hyperglycemia are also well researched predictors of poor outcomes in general for AIS-

LVO patients.<sup>34-36</sup> Additionally, higher stroke severity on admission is well established as a predictor of poorer outcomes.<sup>37-39</sup>

This study has limitations to acknowledge. It is limited by its retrospective design, which may lead to selection and unknown bias. Secondly, the mTICI score and interventional parameters were determined by the treating neurointerventionalist and were not validated by a central imaging core laboratory. This can lead to variability in reporting.<sup>40</sup> Lastly, although CTP is readily available at comprehensive stroke centers, smaller rural sites and community hospitals may not have such capabilities.

These results have some important clinical implications. Our study further corroborates the importance of prevention of DM and stroke recurrence. Our results also emphasize the importance of robust CS and minimizing procedural time for optimizing likelihood of excellent recanalization. Larger scale prospective studies should be performed to ascertain the strength of these findings.

### **Conclusion:**

CBV index $\geq$  0.7, absence of DM and prior stroke, lower initial stroke severity and aspiration-MT are independent predictors of excellent recanalization in AIS-LVO patients.

## **Acknowledgements**

None

## **Sources of Funding**

None

## **Disclosures**

Drs. Jeremy Heit and Vivek Yedavalli disclose roles as consultants for Rapid (iSchemaView, Menlo Park, CA). Dr. Greg Albers is the co-founder of Rapid.

## **References**

1. Nogueira RG, Jadhav AP, Haussen DC, Bonafe A, Budzik RF, Bhuva P, et al. Thrombectomy 6 to 24 Hours after Stroke with a Mismatch between Deficit and Infarct. *New England Journal of Medicine*. 2018. pp. 11–21.  
doi:10.1056/nejmoa1706442
2. Tonetti DA, Desai SM, Casillo S, Stone J, Brown M, Jankowitz B, et al. Successful reperfusion, rather than number of passes, predicts clinical outcome after mechanical thrombectomy. *J Neurointerv Surg*. 2020;12: 548–551.
3. Dargazanli C, Fahed R, Blanc R, Gory B, Labreuche J, Duhamel A, et al. Modified Thrombolysis in Cerebral Infarction 2C/Thrombolysis in Cerebral Infarction 3 reperfusion should be the aim of mechanical thrombectomy: Insights from the ASTER trial (Contact Aspiration Versus Stent Retriever for Successful Revascularization). *Stroke*. 2018;49: 1189–1196.
4. Maier B, Finitsis S, Mazighi M, Lapergue B, Marnat G, Sibon I, et al. The Benefit of a Complete over a Successful Reperfusion Decreases with Time. *Ann Neurol*.

2023. doi:10.1002/ana.26599

5. Tung EL, McTaggart RA, Baird GL, Yaghi S, Hemendinger M, Dibiasio EL, et al. Rethinking Thrombolysis in Cerebral Infarction 2b: Which Thrombolysis in Cerebral Infarction Scales Best Define Near Complete Recanalization in the Modern Thrombectomy Era? *Stroke*. 2017;48: 2488–2493.
6. Yoo AJ, Soomro J, Andersson T, Saver JL, Ribo M, Bozorgchami H, et al. Benchmarking the Extent and Speed of Reperfusion: First Pass TIC1 2c-3 Is a Preferred Endovascular Reperfusion Endpoint. *Front Neurol*. 2021;12: 669934.
7. Jang KM, Nam TK, Ko MJ, Choi HH, Kwon JT, Park SW, et al. Thrombolysis in Cerebral Infarction Grade 2C or 3 Represents a Better Outcome than 2B for Endovascular Thrombectomy in Acute Ischemic Stroke: A Network Meta-Analysis. *World Neurosurg*. 2020;136: e419–e439.
8. Jayaraman MV, Kishkovich T, Baird GL, Hemendinger ML, Tung EL, Yaghi S, et al. Association between age and outcomes following thrombectomy for anterior circulation emergent large vessel occlusion is determined by degree of recanalisation. *J Neurointerv Surg*. 2019;11: 114–118.
9. Carvalho A, Rocha M, Rodrigues M, Gregório T, Costa H, Cunha A, et al. Time to Reset the Definition of Successful Revascularization in Endovascular Treatment of Acute Ischemic Stroke. *Cerebrovasc Dis*. 2018;46: 40–45.
10. Russo R, Del Sette B, Mizutani K, Coskun O, Di Maria F, Lapergue B, et al. Mechanical Thrombectomy in Distal Residual Occlusions of the Middle Cerebral



Artery after Large Vessel Recanalization in Acute Stroke: 2b or not 2b? A Pragmatic Approach in Real-Life Scenarios. *World Neurosurg.* 2021;151: e793–e802.

11. Kalousek V, Yoo AJ, Sheth SA, Janardhan V, Mamic J, Janardhan V. Cyclical aspiration using a novel mechanical thrombectomy device is associated with a high TICl 3 first pass effect in large-vessel strokes. *J Neuroimaging.* 2021;31: 912–924.
12. Powers WJ, Rabinstein AA, Ackerson T, Adeoye OM, Bambakidis NC, Becker K, et al. 2018 Guidelines for the Early Management of Patients With Acute Ischemic Stroke: A Guideline for Healthcare Professionals From the American Heart Association/American Stroke Association. *Stroke.* 2018;49: e46–e110.
13. Tan IYL, Demchuk AM, Hopyan J, Zhang L, Gladstone D, Wong K, et al. CT angiography clot burden score and collateral score: correlation with clinical and radiologic outcomes in acute middle cerebral artery infarct. *AJNR Am J Neuroradiol.* 2009;30: 525–531.
14. Menon BK, d’Esterre CD, Qazi EM, Almekhlafi M, Hahn L, Demchuk AM, et al. Multiphase CT Angiography: A New Tool for the Imaging Triage of Patients with Acute Ischemic Stroke. *Radiology.* 2015;275: 510–520.
15. Liu L, Ding J, Leng X, Pu Y, Huang L-A, Xu A, et al. Guidelines for evaluation and management of cerebral collateral circulation in ischaemic stroke 2017. *Stroke Vasc Neurol.* 2018;3: 117–130.
16. Mlynash M, Lansberg MG, Kemp S, Christensen S, Yennu A, Heit JJ, et al. Abstract WP79: Combination of Tmax and Relative CBV Perfusion Parameters More

## Accurately Predicts CTA Collaterals Than a Single Perfusion Parameter in DEFUSE

3. Stroke. 50: AWP79–AWP79.

17. Arenillas JF, Cortijo E, García-Bermejo P, Levy EI, Jahan R, Liebeskind D, et al. Relative cerebral blood volume is associated with collateral status and infarct growth in stroke patients in SWIFT PRIME. *J Cereb Blood Flow Metab.* 2018;38: 1839–1847.
18. Rao VL, Mlynash M, Christensen S, Yennu A, Kemp S, Zaharchuk G, et al. Collateral status contributes to differences between observed and predicted 24-h infarct volumes in DEFUSE 3. *J Cereb Blood Flow Metab.* 2020;40: 1966–1974.
19. MacLellan A, Mlynash M, Kemp S, Ortega-Gutierrez S, Heit JJ, Marks MP, et al. Perfusion Imaging Collateral Scores Predict Infarct Growth in Non-Reperused DEFUSE 3 Patients. *J Stroke Cerebrovasc Dis.* 2022;31: 106208.
20. Liebeskind DS, Tomsick TA, Foster LD, Yeatts SD, Carrozzella J, Demchuk AM, et al. Collaterals at angiography and outcomes in the Interventional Management of Stroke (IMS) III trial. *Stroke.* 2014;45: 759–764.
21. Vagal A, Menon BK, Foster LD, Livorine A, Yeatts SD, Qazi E, et al. Association Between CT Angiogram Collaterals and CT Perfusion in the Interventional Management of Stroke III Trial. *Stroke.* 2016;47: 535–538.
22. Cortijo E, Calleja AI, García-Bermejo P, Mulero P, Pérez-Fernández S, Reyes J, et al. Relative cerebral blood volume as a marker of durable tissue-at-risk viability in hyperacute ischemic stroke. *Stroke.* 2014;45: 113–118.

23. Nael K, Sakai Y, Larson J, Goldstein J, Deutsch J, Awad AJ, et al. CT Perfusion collateral index in assessment of collaterals in acute ischemic stroke with delayed presentation: Comparison to single phase CTA. *J Neuroradiol.* 2022;49: 198–204.
24. García-Tornel Á, Ciolli L, Rubiera M, Requena M, Muchada M, Pagola J, et al. Leptomeningeal Collateral Flow Modifies Endovascular Treatment Efficacy on Large-Vessel Occlusion Strokes. *Stroke.* 2021;52: 299–303.
25. Liebeskind DS. Collateral circulation. *Stroke.* 2003;34: 2279–2284.
26. Jang KM, Choi HH, Nam TK, Byun JS. Clinical outcomes of first-pass effect after mechanical thrombectomy for acute ischemic stroke: A systematic review and meta-analysis. *Clin Neurol Neurosurg.* 2021;211: 107030.
27. Bourcier R, Goyal M, Liebeskind DS, Muir KW, Desal H, Siddiqui AH, et al. Association of Time From Stroke Onset to Groin Puncture With Quality of Reperfusion After Mechanical Thrombectomy: A Meta-analysis of Individual Patient Data From 7 Randomized Clinical Trials. *JAMA Neurol.* 2019;76: 405–411.
28. Wang R, Aslan A, Khalili N, Garg T, Kotha A, Hamam O, et al. Groin Puncture to Recanalization Time May Be a Strong Predictor of mTICI 2c/3 over mTICI 2b in Patients with Large Vessel Occlusions Successfully Recanalized with Mechanical Thrombectomy. *Diagnostics (Basel).* 2022;12. doi:10.3390/diagnostics12102557
29. Alawieh A, Chatterjee AR, Vargas J, Chaudry MI, Lena J, Turner R, et al. Lessons Learned Over More than 500 Stroke Thrombectomies Using ADAPT With Increasing Aspiration Catheter Size. *Neurosurgery.* 2020;86: 61–70.

30. Qin C, Shang K, Xu S-B, Wang W, Zhang Q, Tian D-S. Efficacy and safety of direct aspiration versus stent-retriever for recanalization in acute cerebral infarction: A PRISMA-compliant systematic review and meta-analysis. *Medicine* . 2018;97: e12770.
31. Wei D, Mascitelli JR, Nistal DA, Kellner CP, Fifi JT, Mocco JD, et al. The Use and Utility of Aspiration Thrombectomy in Acute Ischemic Stroke: A Systematic Review and Meta-Analysis. *AJNR Am J Neuroradiol*. 2017;38: 1978–1983.
32. Blanc R, Redjem H, Ciccio G, Smajda S, Desilles J-P, Orng E, et al. Predictors of the Aspiration Component Success of a Direct Aspiration First Pass Technique (ADAPT) for the Endovascular Treatment of Stroke Reperfusion Strategy in Anterior Circulation Acute Stroke. *Stroke*. 2017;48: 1588–1593.
33. Flach C, Muruet W, Wolfe CDA, Bhalla A, Douiri A. Risk and Secondary Prevention of Stroke Recurrence: A Population-Base Cohort Study. *Stroke*. 2020;51: 2435–2444.
34. Salsano G, Pracucci G, Mavilio N, Saia V, Bandettini di Poggio M, Malfatto L, et al. Complications of mechanical thrombectomy for acute ischemic stroke: Incidence, risk factors, and clinical relevance in the Italian Registry of Endovascular Treatment in acute stroke. *Int J Stroke*. 2021;16: 818–827.
35. Ganesh A, Ospel JM, Menon BK, Demchuk AM, McTaggart RA, Nogueira RG, et al. Assessment of Discrepancies Between Follow-up Infarct Volume and 90-Day Outcomes Among Patients With Ischemic Stroke Who Received Endovascular

Therapy. JAMA Netw Open. 2021;4: e2132376.

36. Chalos V, Venema E, Mulder MJHL, Roozenbeek B, Steyerberg EW, Wermer MJH, et al. Development and Validation of a Postprocedural Model to Predict Outcome After Endovascular Treatment for Ischemic Stroke. JAMA Neurol. 2023.  
doi:10.1001/jamaneurol.2023.2392
37. Meinel T, Lerch C, Fischer U, Beyeler M, Mujanovic A, Kurmann C, et al. Multivariable Prediction Model for Futile Recanalization Therapies in Patients With Acute Ischemic Stroke. Neurology. 2022;99: e1009–18.
38. Bhatia R, Hill MD, Shobha N, Menon B, Bal S, Kochar P, et al. Low rates of acute recanalization with intravenous recombinant tissue plasminogen activator in ischemic stroke: real-world experience and a call for action. Stroke. 2010;41: 2254–2258.
39. Park J-S, Kwak H-S, Chung GH, Hwang S. The Prognostic Value of CT-Angiographic Parameters After Reperfusion Therapy in Acute Ischemic Stroke Patients With Internal Carotid Artery Terminus Occlusion: Leptomeningeal Collateral Status and Clot Burden Score. J Stroke Cerebrovasc Dis. 2018;27: 2797–2803.
40. Goyal M, Fargen KM, Turk AS, Mocco J, Liebeskind DS, Frei D, et al. 2C or not 2C: defining an improved revascularization grading scale and the need for standardization of angiography outcomes in stroke trials. J Neurointerv Surg. 2014;6: 83–86.

## **Tables**

### **1. Baseline comparison between patients recanalized to mTICI\* 2B vs. 2C/3**

| <b>Characteristic</b>                         | <b>All (n=149)</b> | <b>mTICI 2C/3<br/>(n=110)</b> | <b>mTICI 2B<br/>(n=39)</b> | <b>p-value</b> |
|-----------------------------------------------|--------------------|-------------------------------|----------------------------|----------------|
| <b>Demographics</b>                           |                    |                               |                            |                |
| Age, median (IQR <sup>†</sup> )               | 70 (64-78.5)       | 72 (64-79)                    | 67 (63-76)                 | 0.6283         |
| Sex, no. (%)                                  |                    |                               |                            |                |
| Female,                                       | 86 (57.7%)         | 63 (57.3%)                    | 23 (59.0%)                 | 0.8534         |
| Male                                          | 63 (42.3%)         | 47 (42.7%)                    | 16 (41.0%)                 |                |
| Race, no. (%)                                 |                    |                               |                            |                |
| Black/African American,                       | 60 (40.3%)         | 42 (38.2%)                    | 18 (46.2%)                 |                |
| Caucasian                                     | 80 (53.7%)         | 61 (55.5%)                    | 19 (48.7%)                 | 0.8881         |
| Asian                                         | 4 (2.7%)           | 3 (2.7%)                      | 1 (2.6%)                   |                |
| Other                                         | 5 (3.4%)           | 4 (3.6%)                      | 1 (2.6%)                   |                |
| Antiplatelet/Anticoagulation Therapy, no. (%) | 63 (42.3%)         | 46 (41.8%)                    | 17 (43.6%)                 | 0.8474         |
| Tobacco Use, no. (%)                          | 61 (40.9%)         | 44 (40.0%)                    | 17 (43.6%)                 | 0.6953         |
| Alcohol Use Disorder, no. (%)                 | 38 (25.5%)         | 29 (26.4%)                    | 9 (23.1%)                  | 0.6858         |

|                                                       |                                           |                      |                      |               |
|-------------------------------------------------------|-------------------------------------------|----------------------|----------------------|---------------|
| Hypertension, no. (%)                                 | 119<br>(79.9%)                            | 85 (77.3%)           | 34 (87.2%)           | 0.1850        |
| Hyperlipidemia, no. (%)                               | 79 (53.0%)                                | 54 (49.1%)           | 25 (64.1%)           | 0.1065        |
| Diabetes Mellitus, no. (%)                            | 41 (27.5%)                                | 25 (22.7%)           | 16 (41.0%)           | <b>0.0279</b> |
| Coronary Artery Disease,<br>no. (%)                   | 89 (59.7%)                                | 66 (60.0%)           | 23 (59.0%)           | 0.9107        |
| Atrial Fibrillation, no. (%)                          | 65 (43.6%)                                | 50 (45.5%)           | 15 (38.5%)           | 0.4493        |
| Prior Stroke/Transient<br>Ischemic Attack, no. (%)    | 33 (22.1%)                                | 18 (16.4%)           | 15 (38.5%)           | <b>0.0043</b> |
| Malignancy, no. (%)                                   | 27 (18.1%)                                | 18 (16.4%)           | 9 (23.1%)            | 0.3497        |
| Body Mass Index (kg/m <sup>2</sup> ),<br>median (IQR) | 27.6 (23.8-<br>31.9)                      | 27.2 (23.6-<br>30.7) | 30.7 (24.2-<br>33.3) | 0.1459        |
| Systolic Blood Pressure<br>(mmHg), median (IQR)       | 147 (132-<br>164)                         | 148 (131-<br>164)    | 147 (132-<br>166)    | 0.6707        |
| Diastolic Blood Pressure<br>(mmHg), median (IQR)      | 83 (74-101)                               | 82 (74-101)          | 86 (71-100)          | 0.6292        |
| Heart Rate (bpm), median<br>(IQR)                     | 82 (72-94)                                | 82 (73-94)           | 75 (68-97)           | 0.2942        |
| Serum Glucose (mg/dL),<br>median (IQR)                | 119 (106-<br>145)                         | 121 (106-<br>144)    | 117 (102-<br>146)    | 0.4782        |
| Serum Creatinine Clearance<br>(mL/min), median (IQR)  | 1 (0.9-1.2)                               | 1 (0.9-1.2)          | 1 (0.8-1.4)          | 0.8254        |
| Serum BUN/Cr <sup>+</sup> Ratio,                      | 16.5 (12.2-<br>16.7 (12.2-<br>15.4 (12.1- |                      |                      | 0.0703        |

|                                             |                |                |                  |               |
|---------------------------------------------|----------------|----------------|------------------|---------------|
| median (IQR)                                | 21.2)          | 22.2)          | 18.5)            |               |
| Hemoglobin (g/dL), median (IQR)             | 13 (11.5-14.1) | 13 (11.6-14)   | 13.3 (11.3-14.4) | 0.6662        |
| <b>Stroke Characteristics</b>               |                |                |                  |               |
| Admission NIHSS <sup>§</sup> , median (IQR) | 15 (12-20)     | 15 (11-19)     | 18 (13-23)       | <b>0.0321</b> |
| Pre-morbid mRS <sup>  </sup> , median (IQR) | 0 (0-1), n=135 | 0 (0-1), n=103 | 0 (0-1), n=32    | 0.8092        |
| TOAST <sup>#</sup> Criteria, no. (%)        |                |                |                  |               |
| Large-Artery Atherosclerosis                | 21 (14.1%)     | 12 (10.9%)     | 9 (23.1%)        |               |
| Cardioembolism                              | 88 (59.1%)     | 66 (60.0%)     | 22 (56.4%)       |               |
| Stroke of Other Determined Etiology         | 5 (3.3%)       | 4 (3.6%)       | 1 (2.6%)         | 0.2870        |
| Stroke of Undetermined Etiology             | 35 (23.5%)     | 28 (25.5%)     | 7 (17.9%)        |               |
| Laterality of Occlusion, no. (%)            |                |                |                  |               |
| Left                                        | 75 (50.3%)     | 53 (48.2%)     | 22 (56.4%)       | 0.3772        |
| Right                                       | 74 (49.7%)     | 57 (51.8%)     | 17 (43.6%)       |               |



Occlusion Site, no. (%)

|               |                |            |            |        |
|---------------|----------------|------------|------------|--------|
| ICA**         | 6 (4.0%)       | 5 (4.5%)   | 1 (2.6%)   |        |
| M1††          | 112<br>(75.2%) | 80 (72.7%) | 32 (82.1%) | 0.6192 |
| Proximal M2‡‡ | 31 (20.8%)     | 25 (22.7%) | 6 (15.4%)  |        |

---

\*mTICI = modified thrombolysis in cerebral infarction score, † IQR = interquartile range, ‡BUN/CR = blood urea nitrogen-to-creatinine ratio, §NIHSS = National Institutes of Health Stroke Scale, ‖ mRS = modified Rankin score, #TOAST = Trial of Org 10172 in Acute Stroke Treatment, \*\*ICA = internal carotid artery, ††M1 = M1 segment of the middle cerebral artery, ‡‡M2 = M2 segment of the middle cerebral artery

## 2. Imaging parameters between patients recanalized to mTICI\* 2B vs. 2C/3

| Characteristic                                       | All (n=149)       | mTICI 2C/3<br>(n=110) | mTICI 2B<br>(n=39) | p-value       |
|------------------------------------------------------|-------------------|-----------------------|--------------------|---------------|
| ASPECTS <sup>†</sup> , median<br>(IQR <sup>‡</sup> ) | 10 (8-10)         | 10 (8-10)             | 9 (7-10)           | 0.0646        |
| Hyperdense MCA <sup>§</sup> Sign,<br>no. (%)         | 86 (57.7%)        | 66 (60.0%)            | 20 (51.3%)         | 0.3437        |
| rCBF <sup>  </sup> <20% (mL),<br>median (IQR)        | 0 (0-8)           | 0 (0-5.3)             | 4 (0-31)           | <b>0.0010</b> |
| rCBF <30% (mL),<br>median (IQR)                      | 5 (0-26)          | 0 (0-17.3)            | 17 (0-67)          | <b>0.0022</b> |
| rCBF <34% (mL),<br>median (IQR)                      | 9 (0-34)          | 7 (0-26)              | 22 (0-76)          | <b>0.0048</b> |
| rCBF <38% (mL),<br>median (IQR)                      | 13 (4-44)         | 11 (0-34.3)           | 29 (5-87)          | <b>0.0053</b> |
| Tmax <sup>#</sup> >4s (mL), median<br>(IQR)          | 214 (154-<br>298) | 217 (150-<br>300)     | 214 (157-290)      | 0.8833        |
| Tmax >6s (mL), median<br>(IQR)                       | 118 (67-<br>159)  | 110 (67-150)          | 147 (62-171)       | 0.3010        |
| Tmax >8s (mL), median<br>(IQR)                       | 71 (35-112)       | 67 (35-100)           | 90 (26-129)        | 0.2175        |
| Tmax >10s (mL), median<br>(IQR)                      | 40 (13-82)        | 40 (13-71)            | 41 (12-107)        | 0.1811        |

|                                                |                   |               |               |               |
|------------------------------------------------|-------------------|---------------|---------------|---------------|
| Calculated Mismatch<br>(mL), median (IQR)      | 96 (58-137)       | 99.5 (62-136) | 86 (50-138)   | 0.4446        |
| Mismatch Ratio, no. (%)                        |                   |               |               |               |
| ≤1.8                                           | 6 (4.0%)          | 3 (2.7%)      | 3 (7.7%)      | 0.1845        |
| >1.8                                           | 143<br>(96.0%)    | 107 (97.3%)   | 36 (92.3%)    |               |
| Hypoperfusion Intensity<br>Ratio, median (IQR) | 0.4 (0.2-<br>0.6) | 0.4 (0.2-0.5) | 0.4 (0.2-0.6) | 0.1349        |
| CBV** Index, no. (%)                           |                   |               |               |               |
| <0.7                                           | 27 (18.1%)        | 13 (11.8%)    | 14 (35.9%)    | <b>0.0008</b> |
| ≥0.7                                           | 122<br>(81.9%)    | 97 (88.2%)    | 25 (64.1%)    |               |

---

\*mTICI = modified thrombolysis in cerebral infarction score, †ASPECTS = Alberta stroke program early computed tomography score, ‡IQR = interquartile range, §MCA = middle cerebral artery, ‖rCBF = relative cerebral blood flow, #Tmax = time to maximum, \*\*CBV = cerebral blood volume

### 3. Comparison of interventions between patients recanalized to mTICI\* 2B vs.

#### 2C/3

| Characteristic                                  | All<br>(n=149)   | mTICI 2C/3<br>(n=110) | mTICI 2B<br>(n=39) | p-value |
|-------------------------------------------------|------------------|-----------------------|--------------------|---------|
| Mechanical                                      | 149              | 110 (100%)            | 39 (100%)          | 1.0000  |
| Thrombectomy, no. (%)                           | (100%)           |                       |                    |         |
| Thrombectomy                                    | 108              | 82 (74.5%)            | 26 (66.7%)         | 0.3438  |
| Alone, no. (%)                                  | (72.5%)          |                       |                    |         |
| Both tPA/TNK <sup>†</sup> and                   | 41 (27.5%)       | 28 (25.5%)            | 13 (33.3%)         | 0.3438  |
| Thrombectomy, no.<br>(%)                        |                  |                       |                    |         |
| Thrombectomy Type, no.<br>(%)                   |                  |                       |                    |         |
| Direct Aspiration                               | 86 (57.7%)       | 72 (65.4%)            | 14 (35.9%)         | 0.0052  |
| Stent Retriever                                 | 9 (6.0%)         | 6 (5.5%)              | 3 (7.7%)           |         |
| Combined                                        | 54 (36.2%)       | 32 (29.1%)            | 22 (56.4%)         |         |
| Number of Passes,<br>median (IQR <sup>‡</sup> ) | 1 (1-2)          | 1 (1-1)               | 1 (1-2)            | 0.0152  |
| LNK <sup>§</sup> to Door (min),<br>median (IQR) | 213 (66-<br>735) | 229 (67-740)          | 189 (60-687)       | 0.6559  |
| Door to Imaging (min),<br>median (IQR)          | 24 (14-38)       | 24 (14-40)            | 24 (13-38)         | 0.8158  |

|                                                            |                   |                   |               |               |
|------------------------------------------------------------|-------------------|-------------------|---------------|---------------|
| LMK to Imaging (min),<br>median (IQR)                      | 245 (88-<br>771)  | 248 (89-772)      | 218 (82-706)  | 0.5863        |
| Door to Groin Puncture<br>(min), median (IQR)              | 148 (122-<br>191) | 155 (122-<br>192) | 138 (121-184) | 0.5241        |
| Groin Puncture to<br>Recanalization (min),<br>median (IQR) | 34 (23-55)        | 32 (22-47)        | 48 (26-78)    | <b>0.0015</b> |
| Door to Recanalization<br>(min), median (IQR)              | 192 (161-<br>251) | 191 (158-<br>250) | 204 (174-268) | 0.1045        |
| mTICI, no. (%)                                             |                   |                   |               |               |
| 2B                                                         | 39 (26.2%)        | -                 | -             |               |
| 2C                                                         | 26 (17.5%)        | -                 | -             | -             |
| 3                                                          | 84 (56.4%)        | -                 | -             |               |

---

\*mTICI = modified thrombolysis in cerebral infarction score, †tPA/TNK = tissue plasminogen activator/tenecteplase, ‡IQR = interquartile range, §LNK = last known well

**4. Significant unadjusted (univariate logistic regressions) and adjusted (stepwise multivariate logistic regression) odds ratio for outcome of mTICI\* 2C/3 vs. 2B**

| Characteristic <sup>†</sup><br>(n=149)                | Univariate<br>Unadjusted<br>OR <sup>‡</sup> (95% CI <sup>§</sup> ) | p-value | Multivariate<br>Adjusted OR<br>(95% CI) | p-value |
|-------------------------------------------------------|--------------------------------------------------------------------|---------|-----------------------------------------|---------|
| <b>Admission NIHSS<sup>  </sup></b>                   | 0.9379 (0.8839-<br>0.9951)                                         | 0.0338  | 0.9284 (0.8643-<br>0.9974)              | 0.0362  |
| <b>Diabetes Mellitus</b>                              |                                                                    |         |                                         |         |
| No                                                    | Reference                                                          |         | Reference                               |         |
| Yes                                                   | 0.4228 (0.1941-<br>0.9209)                                         | 0.0369  | 0.4150 (0.1727-<br>0.9974)              | 0.0499  |
| <b>Prior<br/>Stroke/Transient<br/>Ischemic Attack</b> |                                                                    |         |                                         |         |
| No                                                    | Reference                                                          |         | Reference                               |         |
| Yes                                                   | 0.3130 (0.1380-<br>0.7103)                                         | 0.0043  | 0.2742 (0.1073-<br>0.7008)              | 0.0069  |
| rCBF <sup>#</sup> <20% (mL)                           | 0.9706 (0.9501-<br>0.9916)                                         | 0.0062  | -                                       | -       |
| rCBF <30% (mL)                                        | 0.9813 (0.9693-                                                    | 0.0026  | -                                       | -       |

|                                       |                             |        |                            |        |
|---------------------------------------|-----------------------------|--------|----------------------------|--------|
|                                       | 0.9934)                     |        |                            |        |
| rCBF <34% (mL)                        | 0.9840 (0.9735-<br>0.9946)  | 0.0033 | -                          | -      |
| rCBF <38% (mL)                        | 0.9857 (0.9763-<br>0.9953)  | 0.0035 | -                          | -      |
| <b>CBV** Index</b>                    |                             |        |                            |        |
| <0.7                                  | Reference                   |        | Reference                  |        |
| ≥0.7                                  | 4.1785 (1.7443-<br>10.0094) | 0.0013 | 3.7518 (1.4215-<br>9.9023) | 0.0074 |
| <b>Thrombectomy Type</b>              |                             |        |                            |        |
| Other                                 | Reference                   |        | Reference                  |        |
| Aspiration<br>Alone                   | 3.3835 (1.5773-<br>7.2580)  | 0.0013 | 2.8906 (1.2479-<br>6.6954) | 0.0120 |
| Groin to recanalization<br>time (min) | 0.9802 (0.9687-<br>0.9920)  | 0.0010 | -                          | -      |

---

\*mTICI = modified thrombolysis in cerebral infarction, †Bolded characteristics were ultimately included in multivariate regression model, ‡OR = odds ratio, §CI = confidence interval, ||NIHSS = National Institutes of Health Stroke Scale, #rCBF = relative cerebral blood flow, \*\*CBV = cerebral blood volume

## Figures with Figure Legends

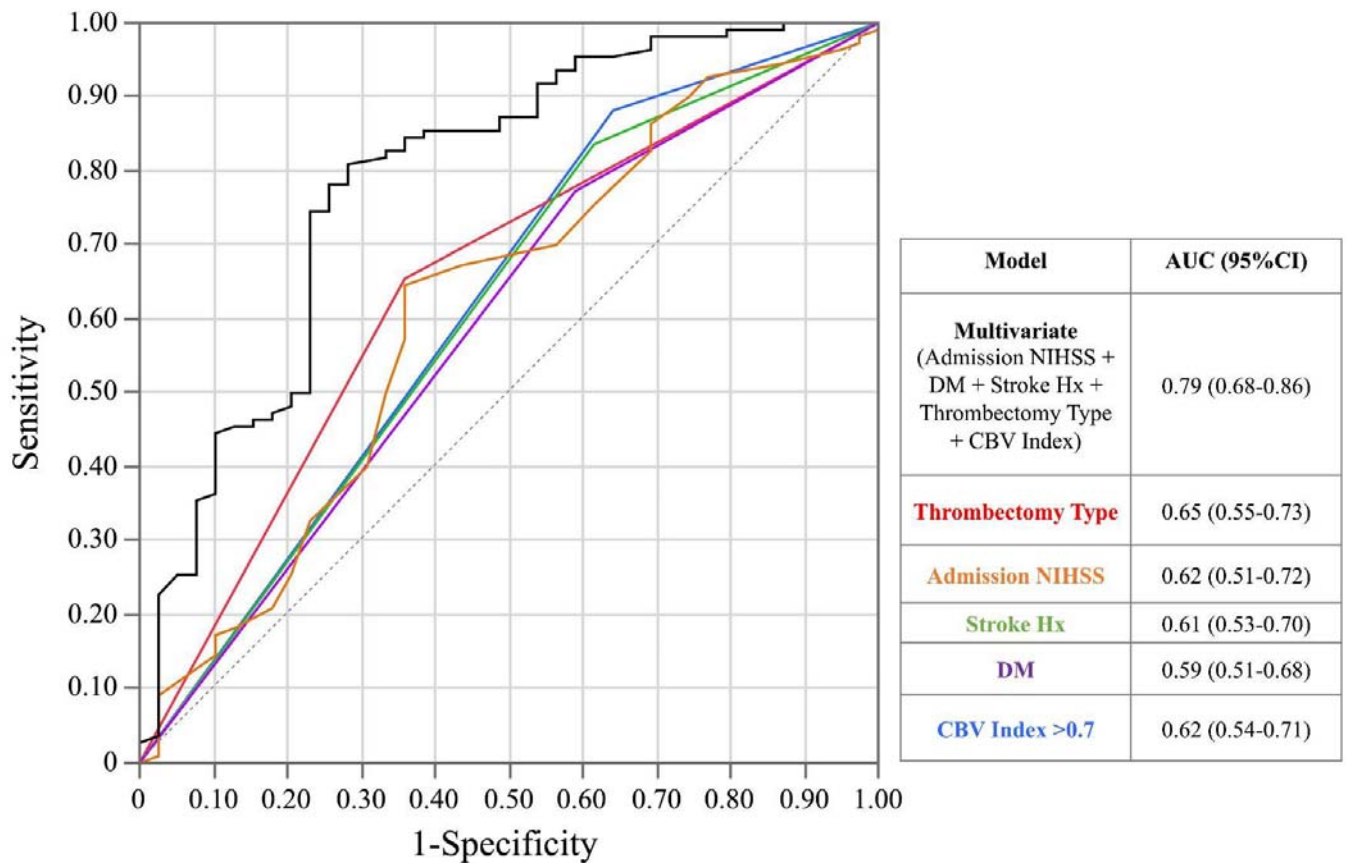

**Figure 1:** Receiver operator characteristics curve with area under the curve for dichotomized CBV index (>0.7), admission NIHSS, diabetes mellitus, prior stroke history, and aspiration thrombectomy as univariate factors and the combined multivariate model for outcome of mTICI 2C/3 versus 2B. Abbreviations: CBV = cerebral blood volume, NIHSS = National Institutes of Health Stroke Scale, mTICI = modified thrombolysis in cerebral infarction score, AUC = area under the curve, CI = confidence interval, DM = diabetes mellitus, Stroke Hx = stroke history.



| Characteristic                                     | All (n=148)      | mTICI 2c/3 (n=110) | mTICI 2B (n=39)  | p-value |
|----------------------------------------------------|------------------|--------------------|------------------|---------|
| <b>Demographics</b>                                |                  |                    |                  |         |
| Age, median (IQR) <sup>1</sup>                     | 70 (64-78.5)     | 72 (64-79)         | 67 (63-76)       | 0.6283  |
| Sex, no. (%)                                       |                  |                    |                  |         |
| Female                                             | 86 (57.7%)       | 63 (57.3%)         | 23 (59.0%)       | 0.8534  |
| Male                                               | 63 (42.3%)       | 47 (42.7%)         | 16 (41.0%)       |         |
| Race, no. (%)                                      |                  |                    |                  |         |
| Black/African American                             | 60 (40.3%)       | 42 (38.2%)         | 18 (46.2%)       | 0.8881  |
| Caucasian                                          | 80 (53.7%)       | 61 (55.5%)         | 19 (48.7%)       |         |
| Asian                                              | 4 (2.7%)         | 3 (2.7%)           | 1 (2.6%)         |         |
| Other                                              | 5 (3.4%)         | 4 (3.6%)           | 1 (2.6%)         |         |
| Antiplatelet/Anticoagulation Therapy, no. (%)      |                  |                    |                  |         |
| Tobacco Use, no. (%)                               | 61 (40.9%)       | 44 (40.0%)         | 17 (43.6%)       | 0.6953  |
| Alcohol Use Disorder, no. (%)                      | 38 (25.5%)       | 29 (26.4%)         | 9 (23.1%)        | 0.6858  |
| Hypertension, no. (%)                              |                  |                    |                  |         |
| Hypertension                                       | 119 (79.9%)      | 85 (77.3%)         | 34 (87.2%)       | 0.1850  |
| Hyperlipidemia, no. (%)                            |                  |                    |                  |         |
| Hyperlipidemia                                     | 79 (53.0%)       | 54 (49.1%)         | 25 (64.1%)       | 0.1065  |
| Diabetes Mellitus, no. (%)                         |                  |                    |                  |         |
| Diabetes Mellitus                                  | 41 (27.5%)       | 25 (22.7%)         | 16 (41.0%)       | 0.0279  |
| Coronary Artery Disease, no. (%)                   |                  |                    |                  |         |
| Coronary Artery Disease                            | 89 (59.7%)       | 66 (60.0%)         | 23 (59.0%)       | 0.9107  |
| Atrial Fibrillation, no. (%)                       |                  |                    |                  |         |
| Atrial Fibrillation                                | 65 (43.6%)       | 50 (45.5%)         | 15 (38.5%)       | 0.4493  |
| Prior Stroke/Transient Ischemic Attack, no. (%)    |                  |                    |                  |         |
| Prior Stroke/Transient Ischemic Attack             | 33 (22.1%)       | 18 (16.4%)         | 15 (38.5%)       | 0.0043  |
| Malignancy, no. (%)                                |                  |                    |                  |         |
| Malignancy                                         | 27 (18.1%)       | 18 (16.4%)         | 9 (23.1%)        | 0.3497  |
| Body Mass Index (kg/m <sup>2</sup> ), median (IQR) |                  |                    |                  |         |
| Body Mass Index                                    | 27.6 (23.8-31.9) | 27.2 (23.6-30.7)   | 30.7 (24.2-33.3) | 0.1459  |
| Systolic Blood Pressure (mmHg), median (IQR)       |                  |                    |                  |         |
| Systolic Blood Pressure                            | 147 (132-164)    | 148 (131-164)      | 147 (132-166)    | 0.6707  |
| Diastolic Blood Pressure (mmHg), median (IQR)      |                  |                    |                  |         |
| Diastolic Blood Pressure                           | 83 (74-101)      | 82 (74-101)        | 86 (71-100)      | 0.6292  |
| Heart Rate (bpm), median (IQR)                     |                  |                    |                  |         |
| Heart Rate                                         | 82 (72-94)       | 82 (73-94)         | 75 (68-97)       | 0.2942  |
| Serum Glucose (mg/dL), median (IQR)                |                  |                    |                  |         |
| Serum Glucose                                      | 119 (106-145)    | 121 (106-144)      | 117 (102-146)    | 0.4782  |
| Serum Creatinine Clearance (mL/min), median (IQR)  |                  |                    |                  |         |
| Serum Creatinine Clearance                         | 1 (0.9-1.2)      | 1 (0.9-1.2)        | 1 (0.8-1.4)      | 0.8254  |
| Serum BUN/Cr <sup>2</sup> Ratio, median (IQR)      |                  |                    |                  |         |
| Serum BUN/Cr <sup>2</sup> Ratio                    | 16.5 (12.2-21.2) | 16.7 (12.2-22.2)   | 15.4 (12.1-18.5) | 0.0703  |
| Hemoglobin (g/dL), median (IQR)                    |                  |                    |                  |         |
| Hemoglobin                                         | 13 (11.5-14.1)   | 13 (11.6-14)       | 13.3 (11.3-14.4) | 0.6662  |
| <b>Stroke Characteristics</b>                      |                  |                    |                  |         |
| Admission NIHSS <sup>2</sup> , median (IQR)        |                  |                    |                  |         |
| Admission NIHSS                                    | 15 (12-20)       | 15 (11-19)         | 18 (13-23)       | 0.0321  |
| Pre-morbid mRS <sup>3</sup> , median (IQR)         |                  |                    |                  |         |
| Pre-morbid mRS                                     | 0 (0-1), n=135   | 0 (0-1), n=103     | 0 (0-1), n=32    | 0.8092  |
| TOAST <sup>4</sup> Criteria, no. (%)               |                  |                    |                  |         |
| Atherosclerosis                                    |                  |                    |                  |         |
| Large-Artery                                       | 21 (14.1%)       | 12 (10.9%)         | 9 (23.1%)        |         |
| Cardioembolism                                     | 88 (59.1%)       | 66 (60.0%)         | 22 (56.4%)       |         |
| Stroke of Other Determined Etiology                | 5 (3.3%)         | 4 (3.6%)           | 1 (2.6%)         | 0.2870  |
| Undetermined Etiology                              |                  |                    |                  |         |
| Stroke of Undetermined Etiology                    | 35 (23.5%)       | 28 (25.5%)         | 7 (17.9%)        |         |
| Laterality of Occlusion, no. (%)                   |                  |                    |                  |         |
| Left                                               |                  |                    |                  |         |
| Left                                               | 75 (50.3%)       | 53 (48.2%)         | 22 (56.4%)       | 0.3772  |
| Right                                              |                  |                    |                  |         |
| Right                                              | 74 (49.7%)       | 57 (51.8%)         | 17 (43.6%)       |         |
| Occlusion Site, no. (%)                            |                  |                    |                  |         |
| ICA**                                              |                  |                    |                  |         |
| ICA**                                              | 6 (4.0%)         | 5 (4.5%)           | 1 (2.6%)         | 0.6192  |
| M1**                                               |                  |                    |                  |         |
| M1**                                               | 112 (75.2%)      | 80 (72.7%)         | 32 (82.1%)       |         |
| Proximal M2**                                      |                  |                    |                  |         |
| Proximal M2**                                      | 31 (20.8%)       | 25 (22.7%)         | 6 (15.4%)        |         |

\*mTICI = modified thrombolysis in cerebral infarction score, <sup>1</sup>IQR = interquartile range, <sup>2</sup>BUN/Cr = blood urea nitrogen-to-creatinine ratio, <sup>3</sup>NIHSS = National Institutes of Health Stroke Scale, <sup>4</sup>mRS = modified Rankin score, <sup>5</sup>TOAST = Trial of Org 10172 in Acute Stroke Treatment, \*\*ICA = internal carotid artery, \*\*M1 = M1 segment of the middle cerebral artery, \*\*M2 = M2 segment of the middle cerebral artery

| Characteristic                                   | All (n=149)   | mTICI 2C/3<br>(n=110) | mTICI 2B<br>(n=39) | p-value       |
|--------------------------------------------------|---------------|-----------------------|--------------------|---------------|
| ASPECTS <sup>†</sup> , median (IQR) <sup>‡</sup> | 10 (8-10)     | 10 (8-10)             | 9 (7-10)           | 0.0646        |
| Hyperdense MCA <sup>§</sup> Sign, no. (%)        | 86 (57.7%)    | 66 (60.0%)            | 20 (51.3%)         | 0.3437        |
| rCBF <sup>  </sup> <20% (mL), median (IQR)       | 0 (0-8)       | 0 (0-5.3)             | 4 (0-31)           | <b>0.0010</b> |
| rCBF <30% (mL), median (IQR)                     | 5 (0-26)      | 0 (0-17.3)            | 17 (0-67)          | <b>0.0022</b> |
| rCBF <34% (mL), median (IQR)                     | 9 (0-34)      | 7 (0-26)              | 22 (0-76)          | <b>0.0048</b> |
| rCBF <38% (mL), median (IQR)                     | 13 (4-44)     | 11 (0-34.3)           | 29 (5-87)          | <b>0.0053</b> |
| Tmax <sup>#</sup> >4s (mL), median (IQR)         | 214 (154-298) | 217 (150-300)         | 214 (157-290)      | 0.8833        |
| Tmax >6s (mL), median (IQR)                      | 118 (67-159)  | 110 (67-150)          | 147 (62-171)       | 0.3010        |
| Tmax >8s (mL), median (IQR)                      | 71 (35-112)   | 67 (35-100)           | 90 (26-129)        | 0.2175        |
| Tmax >10s (mL), median (IQR)                     | 40 (13-82)    | 40 (13-71)            | 41 (12-107)        | 0.1811        |
| Calculated Mismatch (mL), median (IQR)           | 96 (58-137)   | 99.5 (62-136)         | 86 (50-138)        | 0.4446        |
| Mismatch Ratio, no. (%)                          |               |                       |                    |               |
| ≤1.8                                             | 6 (4.0%)      | 3 (2.7%)              | 3 (7.7%)           | 0.1845        |
| >1.8                                             | 143 (96.0%)   | 107 (97.3%)           | 36 (92.3%)         |               |
| Hypoperfusion Intensity Ratio, median (IQR)      | 0.4 (0.2-0.6) | 0.4 (0.2-0.5)         | 0.4 (0.2-0.6)      | 0.1349        |
| CBV <sup>**</sup> Index, no. (%)                 |               |                       |                    |               |
| <0.7                                             | 27 (18.1%)    | 13 (11.8%)            | 14 (35.9%)         | <b>0.0008</b> |
| ≥0.7                                             | 122 (81.9%)   | 97 (88.2%)            | 25 (64.1%)         |               |

\*mTICI = modified thrombolysis in cerebral infarction score, †ASPECTS = Alberta stroke program early computed tomography score, ‡IQR = interquartile range, §MCA = middle cerebral artery, ||rCBF = relative cerebral blood flow,

#Tmax = time to maximum, \*\*CBV = cerebral blood volume

### 3. Comparison of interventions between patients recanalized to mTICI\* 2B vs. 2C/3

| Characteristic                                             | All<br>(n=149)    | mTICI 2C/3<br>(n=110) | mTICI 2B<br>(n=39) | p-value |
|------------------------------------------------------------|-------------------|-----------------------|--------------------|---------|
| Mechanical                                                 | 149 (100%)        | 110 (100%)            | 39 (100%)          | 1.0000  |
| Thrombectomy, no. (%)                                      | )                 |                       |                    |         |
| Thrombectomy                                               | 108               | 82 (74.5%)            | 26 (66.7%)         | 0.3438  |
| Alone, no. (%)                                             | (72.5%)           |                       |                    |         |
| Both tPA/TNK† and<br>Thrombectomy, no.<br>(%)              | 41 (27.5%)        | 28 (25.5%)            | 13 (33.3%)         |         |
| Thrombectomy Type, no.<br>(%)                              |                   |                       |                    |         |
| Direct Aspiration                                          | 86 (57.7%)        | 72 (65.4%)            | 14 (35.9%)         | 0.0052  |
| Stent Retriever                                            | 9 (6.0%)          | 6 (5.5%)              | 3 (7.7%)           |         |
| Combined                                                   | 54 (36.2%)        | 32 (29.1%)            | 22 (56.4%)         |         |
| Number of Passes,<br>median (IQR‡)                         | 1 (1-2)           | 1 (1-1)               | 1 (1-2)            | 0.0152  |
| LNK§ to Door (min),<br>median (IQR)                        | 213 (66-<br>735)  | 229 (67-740)          | 189 (60-687)       | 0.6559  |
| Door to Imaging (min),<br>median (IQR)                     | 24 (14-38)        | 24 (14-40)            | 24 (13-38)         | 0.8158  |
| LMK to Imaging (min),<br>median (IQR)                      | 245 (88-<br>771)  | 248 (89-772)          | 218 (82-706)       | 0.5863  |
| Door to Groin Puncture<br>(min), median (IQR)              | 148 (122-<br>191) | 155 (122-<br>192)     | 138 (121-184)      | 0.5241  |
| Groin Puncture to<br>Recanalization (min),<br>median (IQR) | 34 (23-55)        | 32 (22-47)            | 48 (26-78)         | 0.0015  |
| Door to Recanalization<br>(min), median (IQR)              | 192 (161-<br>251) | 191 (158-<br>250)     | 204 (174-268)      | 0.1045  |
| mTICI, no. (%)                                             |                   |                       |                    |         |
| 2B                                                         | 39 (26.2%)        | -                     | -                  |         |
| 2C                                                         | 26 (17.5%)        | -                     | -                  | -       |
| 3                                                          | 84 (56.4%)        | -                     | -                  |         |

\*mTICI = modified thrombolysis in cerebral infarction score, †tPA/TNK = tissue plasminogen activator/tenecteplase,

‡IQR = interquartile range, §LNK = last known well

4. Significant unadjusted (univariate logistic regressions) and adjusted (stepwise multivariate logistic

regression) odds ratio for outcome of mTICI\* 2C/3 vs. 2B

medRxiv preprint doi: <https://doi.org/10.1101/2023.08.22.23294452>; this version posted August 24, 2023.

Characteristics (which was not certified by peer review) is the author/funder, who has granted medRxiv a license to display the preprint in perpetuity. It is made available under a [CC-BY-ND 4.0 International license](https://creativecommons.org/licenses/by-nd/4.0/).

| (n=149)                                       | Unadjusted                             |        | Adjusted OR            |        |
|-----------------------------------------------|----------------------------------------|--------|------------------------|--------|
|                                               | OR <sup>‡</sup> (95% CI <sup>§</sup> ) |        | (95% CI)               |        |
| <b>Admission NIHSS<sup>  </sup></b>           | 0.9379 (0.8839-0.9951)                 | 0.0338 | 0.9284 (0.8643-0.9974) | 0.0362 |
| <b>Diabetes Mellitus</b>                      |                                        |        |                        |        |
| No                                            | Reference                              |        | Reference              |        |
| Yes                                           | 0.4228 (0.1941-0.9209)                 | 0.0369 | 0.4150 (0.1727-0.9974) | 0.0499 |
| <b>Prior Stroke/Transient Ischemic Attack</b> |                                        |        |                        |        |
| No                                            | Reference                              |        | Reference              |        |
| Yes                                           | 0.3130 (0.1380-0.7103)                 | 0.0043 | 0.2742 (0.1073-0.7008) | 0.0069 |
| rCBF# <20% (mL)                               | 0.9706 (0.9501-0.9916)                 | 0.0062 | -                      | -      |
| rCBF <30% (mL)                                | 0.9813 (0.9693-0.9934)                 | 0.0026 | -                      | -      |
| rCBF <34% (mL)                                | 0.9840 (0.9735-0.9946)                 | 0.0033 | -                      | -      |
| rCBF <38% (mL)                                | 0.9857 (0.9763-0.9953)                 | 0.0035 | -                      | -      |
| <b>CBV** Index</b>                            |                                        |        |                        |        |
| <0.7                                          | Reference                              |        | Reference              |        |
| ≥0.7                                          | 4.1785 (1.7443-10.0094)                | 0.0013 | 3.7518 (1.4215-9.9023) | 0.0074 |
| <b>Thrombectomy Type</b>                      |                                        |        |                        |        |
| Other                                         | Reference                              |        | Reference              |        |
| Aspiration Alone                              | 3.3835 (1.5773-7.2580)                 | 0.0013 | 2.8906 (1.2479-6.6954) | 0.0120 |
| Groin to recanalization time (min)            | 0.9802 (0.9687-0.9920)                 | 0.0010 | -                      | -      |

\*mTICI = modified thrombolysis in cerebral infarction, †Bolded characteristics were ultimately included in multivariate regression model, ‡OR = odds ratio, §CI = confidence interval, ||NIHSS = National Institutes of Health Stroke Scale,

#rCBF = relative cerebral blood flow, \*\*CBV = cerebral blood volume

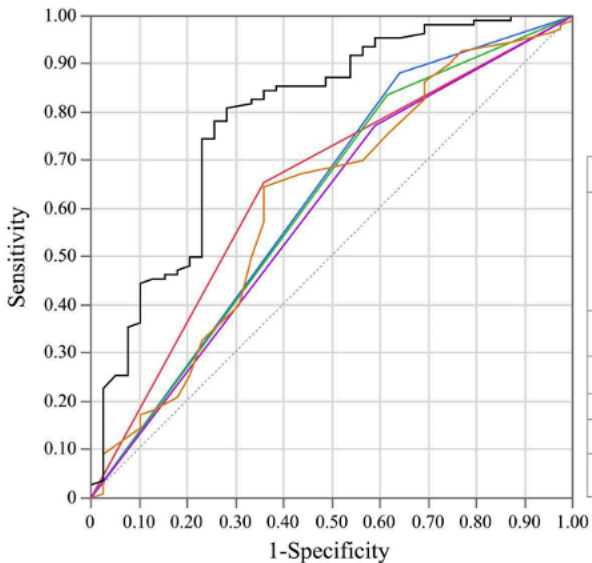

| Model                                                                                              | AUC (95%CI)      |
|----------------------------------------------------------------------------------------------------|------------------|
| <b>Multivariate</b><br>(Admission NIHSS +<br>DM + Stroke Hx +<br>Thrombectomy Type<br>+ CBV Index) | 0.79 (0.68-0.86) |
| <b>Thrombectomy Type</b>                                                                           | 0.65 (0.55-0.73) |
| <b>Admission NIHSS</b>                                                                             | 0.62 (0.51-0.72) |
| <b>Stroke Hx</b>                                                                                   | 0.61 (0.53-0.70) |
| <b>DM</b>                                                                                          | 0.59 (0.51-0.68) |
| <b>CBV Index &gt;0.7</b>                                                                           | 0.62 (0.54-0.71) |

**Figure 1:** Receiver operator characteristics curve with area under the curve for dichotomized CBV index (>0.7), admission NIHSS, diabetes mellitus, prior stroke history, and aspiration thrombectomy as univariate factors and the combined multivariate model for outcome of mTICI 2C/3 versus 2B. Abbreviations: CBV = cerebral blood volume, NIHSS = National Institutes of Health Stroke Scale, mTICI = modified thrombolysis in cerebral infarction score, AUC = area under the curve, CI = confidence interval, DM = diabetes mellitus, Stroke Hx = stroke history.
